# Supplementary material for: New complexes of liquid crystal discotic triphenylenes: induction of the double gyroid phase
Source: Royal Society of Chemistry journal article supplement (doi:10.1039/d1cp00660f), 2021-01-01
Supplement: d1cp00660f1.pdf [file d1cp00660f1.pdf]

## Electronic Supplementary Information (ESI)

### New donor-acceptor liquid crystalline complexes of triphenylene and fluorenylidene derivatives: induction of the double gyroid phase

Olga A. Otmakhova,<sup>a</sup> Alexey A Piryazev,<sup>b,c</sup> Galina N. Bondarenko,<sup>a</sup> Georgiy A. Shandryuk,<sup>a</sup> Alexey S. Merekalov,<sup>a</sup> Alina V. Maryasevskaya,<sup>b,c</sup> Dimitri A. Ivanov<sup>b,c,d</sup> and Raisa V. Talroze\*<sup>a</sup>

<sup>a</sup>*A.V. Topchiev Institute of Petrochemical Synthesis, Russian Academy of Sciences, Leninsky prospect 29, 119991 Moscow, Russian Federation*

<sup>b</sup>*M.V. Lomonosov Moscow State University, 119991, Moscow, GSP-1, 1 Leninskiye Gory, Russian Federation*

<sup>c</sup>*Institute of Problems of Chemical Physics, Russian Academy of Sciences, Semenov Av. 1, 142432, Chernogolovka, Moscow region, Russian Federation*

<sup>d</sup>*Institut de Sciences des Matériaux de Mulhouse, CNRS UMR 7361, 15, rue Jean Starcky, F- 68057, France*

*E-mail: ritalroze@ips.ac.ru*

### FTIR spectra

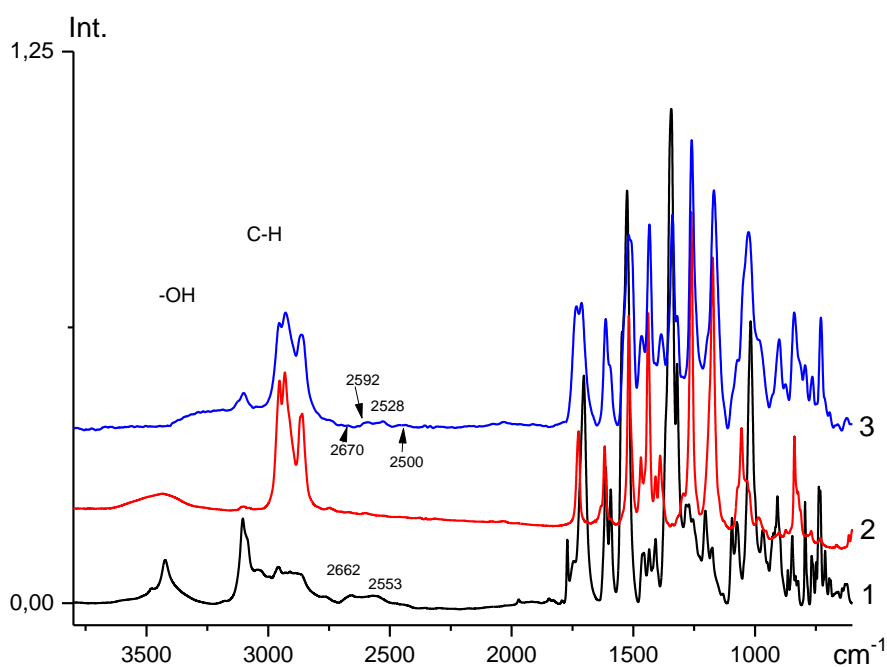

a)

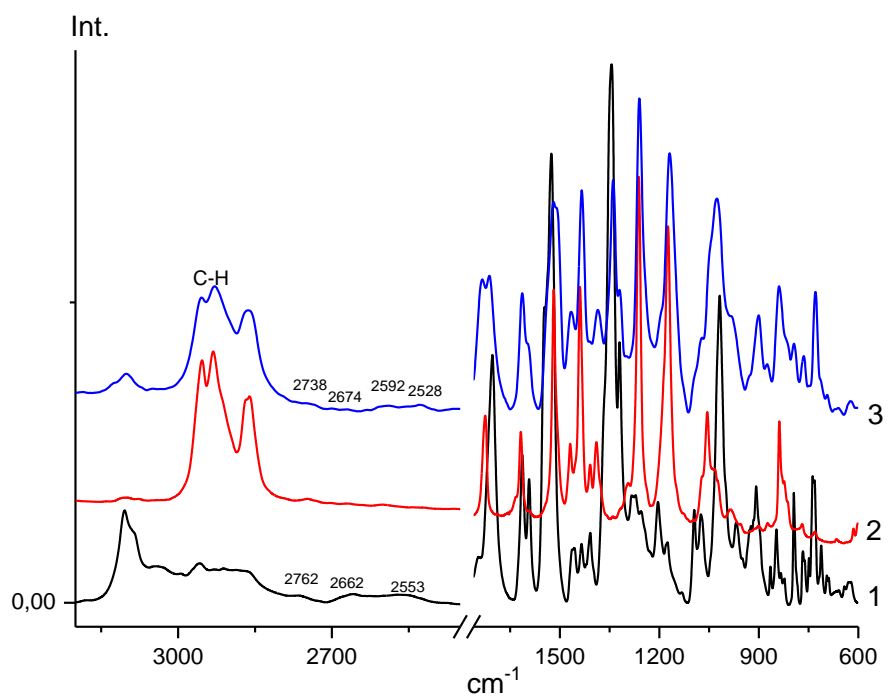

b)

Figure S1. FTIR spectra a - TNF-carb (1), H5T (2) and TNF-carb /H5T (1:4) (3)  $\text{cm}^{-1}$  and b - TNF-carb (1), TPh-3A (2) and TNF-carb /TPh-3A (1:4)

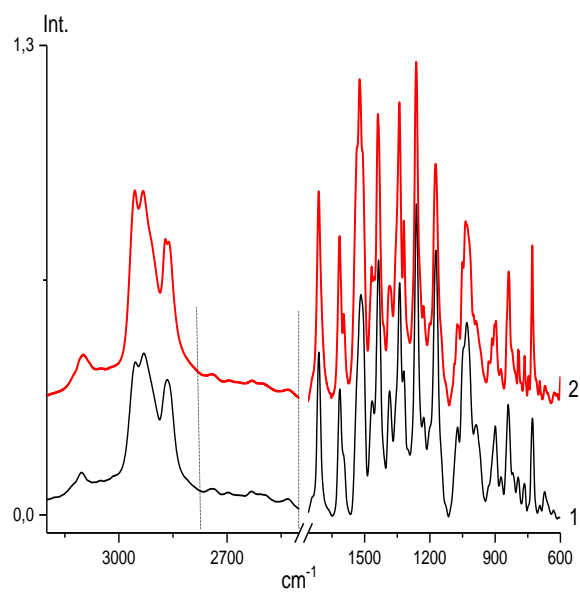

a)

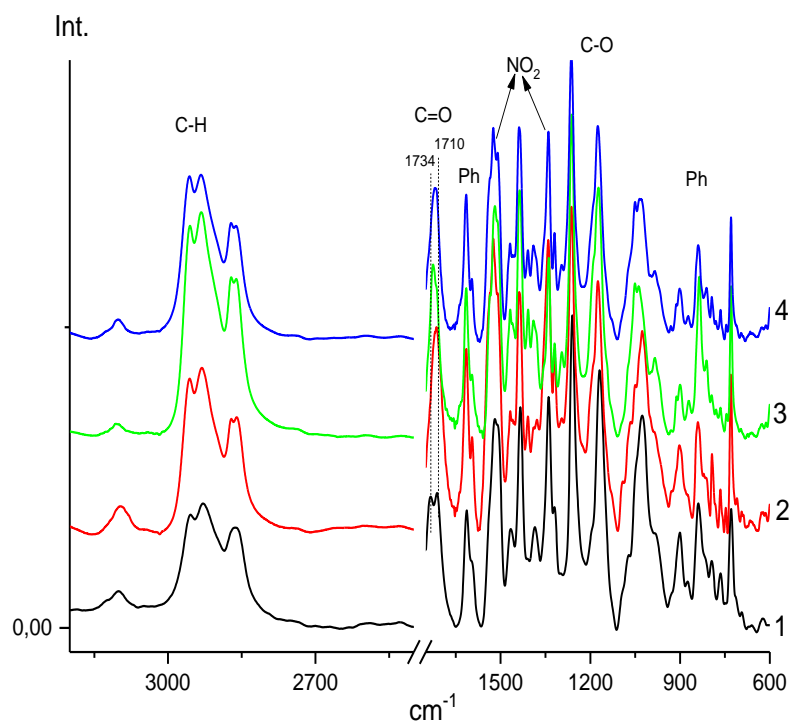

b)

Figure S2. Spectra of the complexes with different stoichiometry: TNF-carb/ H5T 1:4 (1) and 1:2 (2) (a) and TNF-carb/ TPh-3A (b): 1-1:4, 2 – 2:3, 3- 1:1, 4- 3:2 (b)
